# Supplementary material for: Quantitative Trait Loci and Candidate Genes for Neutrophil Recruitment in Sterile Inflammation Mapped in AXB-BXA Recombinant Inbred Mice
Source: PubMed Central journal article supplement (PMC4420501; doi:10.1371/journal.pone.0124117), 2015-05-05
Supplement: pone.0124117.s001.pdf [file pone.0124117.s001.pdf]

**Table S1. Genes from *PNR2*.** Full list of 130 candidate genes located in the *PNR2* QTL on Chr 12. *PNR2* spans a confidence interval of 5.47 Mb (from 87-101.6 and 102.5-105 Mb).

| Gene Symbols  |               |               |               |
|---------------|---------------|---------------|---------------|
| Batf          | Nrp           | Galc          | LOC100040305  |
| Flvcr2        | 1810035L17Rik | Gpr65         | Cpsf2         |
| 0610007P14Rik | Snw1          | Kcnk10        | Slc24a4       |
| Tll5          | EG266459      | 5330409N07Rik | Gm46          |
| Tgfb3         | EG271022      | Spata7        | C030009J22Rik |
| 1700019E19Rik | Oog1          | Ptpn21        | Rin3          |
| Gm805         | LOC100039203  | Zc3h14        | E030047P09Rik |
| 1700020O03Rik | EG435337      | 9430031K09Rik | Lgmn          |
| D930046M13Rik | Adck1         | D230049E03Rik | A930036A04Rik |
| Esrrb         | 3200001D21Rik | Eml5          | Golga5        |
| Vash1         | 4930473H19Rik | A930040O22Rik | Chga          |
| Angel1        | 1700040E09Rik | Ttc8          | ltpk1         |
| Gm263         | Nrxn3         | 4930474N09Rik | Moap1         |
| Thsd3         | E530011G23Rik | Foxn3         | D230037D09Rik |
| 6430527G18Rik | 6430597G12Rik | 3300002A11Rik | 5730410I19Rik |
| 2310044G17Rik | A930035E12Rik | Ttc7b         | Btbd7         |
| Zdhhc22       | B230375D24Rik | 4930556H04Rik | Cox8c         |
| Tmem63c       | LOC100039498  | 1700064M15Rik | 9030205A07Rik |
| Ngb           | 6330549H03Rik | 2610021K21Rik | Prima1        |
| Pomt2         | Dio2          | Tdp1          | Serpina4-ps1  |
| Gstz1         | 4930544I03Rik | LOC100040041  | Asb2          |
| EG625237      | 1700105G05Rik | Kcnk13        | Otub2         |
| Tmed8         | 4930534B04Rik | 4930477G07Rik | 9330161L09Rik |
| LOC100039191  | 5430427M07Rik | 9530050K03Rik | Ddx24         |
| 4933437F05Rik | Tshr          | Psmc1         | D12Ert647e    |
| AI413782      | Gtf2a1        | BC002230      | lfi27         |
| 9330175H22Rik | Ston2         | LOC320288     | 1810023F06Rik |
| 6720456H09Rik | EG666955      | Calm1         | EG238395      |
| Ahsa1         | LOC100039631  | Catsperb      | 8430415E04Rik |
| Sptlc2        | Sel1l         | Tc2n          | Serpina10     |
| EG193330      | 4930559C10Rik | Fbln5         | Serpina6      |
| Alkbh1        | Flrt2         | Atxn3         | Serpina1f     |
|               | 1700019M22Rik |               | Serpina1b     |
